# Supplementary material for: Post-mortem detection of six human herpesviruses (HSV-1, HSV-2, VZV, EBV, CMV, HHV-6) in trigeminal and facial nerve ganglia by PCR
Source: PeerJ. 2019 Jan 9;6:e6095. doi: 10.7717/peerj.6095 (PMC6330031; doi:10.7717/peerj.6095)
Supplement: Supplemental Information 1 — TG stands for trigeminal nerve ganglia and FG stands for facial nerve ganglia. [file peerj-07-6095-s001.xlsx]

## Sheet: Arkusz1
Cadaver number	Sex	Age at death	Cause of death	Sample number	HSV-1	HSV-2	VZV	EBV	CMV	HHV-6
1	Male	19	traffic accident	1 TG	negative	negative	negative	negative	negative	negative
				1 FG	negative	negative	negative	negative	negative	negative
2	Male	50	drowning	2 TG	negative	negative	negative	negative	negative	negative
				2 FG	negative	negative	positive	negative	negative	negative
3	Male	18	traffic accident	3 TG	negative	negative	negative	negative	negative	negative
				3 FG	negative	negative	negative	negative	negative	negative
4	Male	36	fall from height	5 TG	negative	negative	negative	positive	negative	positive
				5 FG	negative	negative	negative	negative	negative	negative
5	Male	43	sudden death	6 TG	negative	negative	negative	negative	negative	negative
				6 FG	negative	negative	negative	negative	negative	positive
6	Male	60	sudden death	7 TG	positive	negative	negative	negative	negative	negative
				7 FG	negative	negative	negative	negative	negative	negative
7	Male	68	ethanol poisoning	8 TG	negative	negative	negative	negative	negative	positive
				8 FG	negative	negative	negative	negative	negative	negative
8	Male	58	ethanol poisoning	9 TG	negative	negative	negative	negative	negative	negative
				9 FG	positive	negative	negative	negative	negative	positive
9	Male	62	myocardial infarction	10 TG	negative	negative	negative	negative	negative	positive
				10 FG	positive	negative	negative	negative	negative	negative
10	Male	59	hanging	11 TG	negative	negative	negative	negative	negative	negative
				11 FG	negative	positive	negative	negative	negative	negative
11	Male	14	hanging	13 TG	negative	negative	negative	negative	negative	negative
				13 FG	negative	negative	negative	negative	negative	negative
12	Male	74	thoracic aortic aneurysm rupture	14 TG	negative	negative	negative	negative	negative	negative
				14 FG	negative	negative	negative	negative	negative	negative
13	Male	64	cardiac arrhythmia	15 TG	negative	negative	negative	negative	negative	negative
				15 FG	positive	negative	negative	negative	negative	positive
14	Female	59	drug poisoning	17 TG	negative	negative	negative	negative	negative	negative
				17 FG	negative	negative	negative	negative	negative	negative
15	Male	53	hanging	18 TG	negative	negative	negative	negative	negative	negative
				18 FG	negative	negative	negative	negative	negative	positive
16	Male	41	myocardial infarction	19 TG	negative	negative	negative	positive	negative	negative
				19 FG	negative	positive	negative	positive	negative	negative
17	Male	28	ethanol poisoning	20 TG	negative	negative	negative	negative	negative	negative
				20 FG	negative	negative	negative	negative	negative	negative
18	Male	54	drowning	21 TG.	negative	negative	negative	negative	negative	negative
				21 FG	negative	negative	positive	negative	positive	negative
19	Male	31	traffic accident	22 TG	positive	negative	negative	negative	negative	negative
				22 FG	negative	negative	negative	negative	negative	negative
20	Female	24	drug poisoning	23 TG	negative	negative	negative	negative	negative	negative
				23 FG	negative	negative	negative	negative	negative	negative
21	Male	61	traffic accident	24 TG	negative	negative	negative	negative	negative	negative
				24 FG	negative	negative	negative	negative	negative	negative
22	Male	40	methanol poisoning	26 TG	negative	negative	negative	negative	negative	negative
				26 FG	negative	negative	negative	negative	negative	positive
23	Male	52	ethanol poisoning	27 TG	negative	negative	negative	negative	negative	negative
				27 FG	negative	negative	negative	negative	negative	positive
24	Male	46	sudden death	28 TG	negative	negative	negative	negative	negative	negative
				28 FG	negative	negative	negative	negative	negative	positive
25	Male	54	cardiac arrhythmia	30 TG	negative	negative	negative	negative	negative	negative
				30 FG	negative	negative	negative	negative	negative	negative
26	Male	35	acethone poisoning	31 TG	positive	negative	negative	negative	negative	negative
				31 FG	negative	negative	negative	negative	negative	positive
27	Male	50	CO poisoning	33 TG	negative	negative	negative	negative	negative	negative
				33 FG	negative	negative	negative	negative	negative	negative
28	Male	38	chest stab wound	34 TG	negative	negative	negative	negative	negative	negative
				34 FG	negative	negative	negative	negative	negative	positive
29	Male	70	myocardial infarction	36 TG	negative	negative	positive	negative	negative	positive
				36 FG	negative	negative	positive	negative	negative	negative
30	Male	65	ethanol poisoning	37 TG	negative	negative	negative	negative	negative	negative
				37 FG	negative	negative	negative	negative	negative	positive
31	Male	63	hanging	38 TG	negative	negative	negative	negative	negative	negative
				38 FG	positive	negative	negative	negative	negative	negative
32	Male	57	methanol poisoning	39 TG	negative	negative	negative	negative	negative	negative
				39 FG	negative	negative	negative	negative	negative	negative
33	Male	42	ethanol poisoning	40 TG	negative	negative	negative	negative	negative	negative
				40 FG	negative	negative	negative	negative	negative	negative
34	Male	56	hanging	41 TG	negative	negative	negative	negative	negative	negative
				41 FG	negative	negative	negative	positive	negative	positive
35	Male	35	hanging	42 TG	negative	negative	negative	negative	negative	negative
				42 FG	negative	negative	negative	negative	negative	negative
36	Male	37	traffic accident	43 TG	negative	negative	negative	negative	negative	positive
				43 FG	negative	negative	negative	negative	negative	negative
37	Male	33	hanging	44 TG	negative	negative	negative	negative	negative	negative
				44 FG	negative	negative	negative	negative	negative	negative
38	Male	28	drowning	45 TG	negative	negative	negative	negative	negative	positive
				45 FG	negative	negative	negative	negative	negative	positive
39	Male	28	traffic accident	46 TG	negative	negative	negative	negative	negative	positive
				46 FG	negative	negative	negative	negative	negative	negative
40	Male	66	pneumonia	47 TG	negative	negative	negative	negative	negative	negative
				47 FG	negative	negative	negative	negative	negative	negative
41	Male	65	hanging	51 TG	negative	negative	negative	negative	negative	negative
				51 FG	negative	negative	negative	positive	negative	negative
42	Male	35	traffic accident	52 TG	negative	negative	negative	negative	negative	negative
				52 FG	negative	negative	negative	negative	negative	negative
43	Female	29	traffic accident	54 TG	negative	negative	negative	negative	negative	negative
				54 FG	negative	negative	negative	negative	negative	negative
44	Female	84	CO poisoning	55 TG	negative	negative	positive	negative	negative	positive
				55 FG	negative	negative	negative	negative	negative	positive
45	Female	54	hanging	56 TG	negative	negative	negative	negative	negative	positive
				56 FG	negative	negative	negative	negative	negative	negative
46	Female	26	hanging	57 TG	negative	negative	negative	negative	negative	negative
				57 FG	negative	negative	negative	negative	negative	positive
47	Female	43	traffic accident	58 TG	negative	negative	negative	negative	negative	negative
				58 FG	negative	negative	negative	negative	negative	positive
